# Supplementary material
Source: Copernicus journal article supplement (doi:10.5194/wes-2026-92)
Supplement: Supplementary file 1 [file wes-2026-92-supplement.pdf]

## S1. Site characteristics and terrain complexity parameters

**Table S1: Coordinates, elevation and relative position of the measurement point and turbine locations.**

| ID                              | Longitude | Latitude | Elevation  | Distant to<br>ms.point | TSI <sub>360</sub><br>5z_hub | TVI <sub>360</sub><br>5z_hub | TSI <sub>30</sub><br>5z_hub | TVI <sub>30</sub><br>5z_hub | TSI <sub>30</sub><br>10z_hub | TVI <sub>30</sub><br>10z_hub | TSI <sub>30</sub><br>20z_hub | TVI <sub>30</sub><br>20z_hub |
|---------------------------------|-----------|----------|------------|------------------------|------------------------------|------------------------------|-----------------------------|-----------------------------|------------------------------|------------------------------|------------------------------|------------------------------|
|                                 | [°E]      | [°N]     | [m a.s.l.] | [m]                    | [°]                          | [%]                          | [°]                         | [%]                         | [°]                          | [%]                          | [°]                          | [%]                          |
| Measurement<br>point (ms.point) | 10.35206  | 51.79958 | 585.00     | 0                      | n/a                          | n/a                          | n/a                         | n/a                         | n/a                          | n/a                          | n/a                          | n/a                          |
| Turbine T1                      | 10.36589  | 51.81012 | 578.44     | 1,512                  | 1.60                         | 0.7%                         | 0.82                        | 1.4%                        | 0.60                         | 1.06%                        | 0.60                         | 1.04%                        |
| Turbine T2                      | 10.36068  | 51.81657 | 590.37     | 1,977                  | 2.03                         | 0.8%                         | 1.21                        | 2.1%                        | 0.98                         | 1.71%                        | 0.98                         | 1.71%                        |
| Turbine T3                      | 10.37290  | 51.80355 | 588.40     | 1,497                  | 1.53                         | 0.6%                         | 0.98                        | 1.7%                        | 0.49                         | 0.86%                        | 0.49                         | 0.85%                        |
| Turbine T4                      | 10.37727  | 51.79651 | 602.44     | 1,776                  | 1.52                         | 0.7%                         | 1.02                        | 1.8%                        | 0.72                         | 1.26%                        | 0.71                         | 1.25%                        |
| Turbine T5                      | 10.38265  | 51.79006 | 618.78     | 2,350                  | 2.14                         | 1.1%                         | 1.11                        | 1.9%                        | 0.95                         | 1.65%                        | 0.97                         | 1.69%                        |
| Turbine T6                      | 10.38877  | 51.78342 | 586.19     | 3,105                  | 3.86                         | 1.5%                         | 2.33                        | 4.1%                        | 1.60                         | 2.80%                        | 1.60                         | 2.80%                        |
| Turbine T7                      | 10.37061  | 51.82455 | 585.41     | 3,070                  | 1.43                         | 0.6%                         | 0.77                        | 1.3%                        | 0.70                         | 1.23%                        | 0.70                         | 1.22%                        |
| Turbine T8                      | 10.37593  | 51.81805 | 550.29     | 2,634                  | 3.74                         | 1.3%                         | 1.86                        | 3.2%                        | 1.24                         | 2.16%                        | 1.26                         | 2.20%                        |
| Turbine T9                      | 10.38187  | 51.81099 | 558.13     | 2,419                  | 4.05                         | 1.6%                         | 2.89                        | 5.0%                        | 1.14                         | 2.00%                        | 1.16                         | 2.02%                        |
| Turbine T10                     | 10.38725  | 51.80443 | 583.38     | 2,490                  | 2.07                         | 0.8%                         | 1.57                        | 2.7%                        | 0.78                         | 1.35%                        | 0.77                         | 1.35%                        |
| Turbine T11                     | 10.39263  | 51.79793 | 592.71     | 2,804                  | 2.68                         | 1.1%                         | 1.67                        | 2.9%                        | 0.96                         | 1.68%                        | 0.95                         | 1.66%                        |
| Turbine T12                     | 10.36751  | 51.78831 | 604.04     | 1,640                  | 1.83                         | 0.8%                         | 1.07                        | 1.9%                        | 0.61                         | 1.06%                        | 0.61                         | 1.07%                        |
| Turbine T13                     | 10.37303  | 51.78184 | 593.90     | 2,442                  | 3.44                         | 1.6%                         | 2.26                        | 3.9%                        | 1.21                         | 2.12%                        | 1.21                         | 2.12%                        |
| Turbine T14                     | 10.37916  | 51.77505 | 520.07     | 3,303                  | 6.22                         | 2.4%                         | 2.94                        | 5.1%                        | 2.15                         | 3.76%                        | 2.13                         | 3.71%                        |
| Turbine T15                     | 10.35217  | 51.78760 | 569.41     | 1,333                  | 2.24                         | 0.8%                         | 0.95                        | 1.7%                        | 0.72                         | 1.26%                        | 0.73                         | 1.27%                        |
| Turbine T16                     | 10.35791  | 51.78007 | 580.08     | 2,193                  | 2.43                         | 0.9%                         | 1.04                        | 1.8%                        | 1.28                         | 2.24%                        | 1.28                         | 2.23%                        |
| Turbine T17                     | 10.36350  | 51.77360 | 585.68     | 2,981                  | 3.35                         | 1.6%                         | 1.29                        | 2.3%                        | 1.71                         | 2.99%                        | 1.71                         | 2.99%                        |
| Turbine T18                     | 10.34237  | 51.77811 | 549.67     | 2,471                  | 2.94                         | 0.7%                         | 1.50                        | 2.6%                        | 1.36                         | 2.37%                        | 1.35                         | 2.35%                        |
| Turbine T19                     | 10.34857  | 51.77125 | 582.43     | 3,145                  | 2.30                         | 0.9%                         | 1.50                        | 2.6%                        | 1.16                         | 2.03%                        | 1.16                         | 2.02%                        |
| Turbine T20                     | 10.35405  | 51.76491 | 589.52     | 3,865                  | 5.25                         | 2.3%                         | 4.37                        | 7.7%                        | 2.70                         | 4.72%                        | 2.69                         | 4.71%                        |

**Table S2: Threshold values of the terrain complexity categories Low, Moderate and High (Source: IEC 61400-1:2019)**

| Radius of circle<br>area | Sector amplitude of<br>fitted plane | Terrain slope index ( <i>TSI</i> ) |          |      | Terrain variation index ( <i>TVI</i> ) |          |      |
|--------------------------|-------------------------------------|------------------------------------|----------|------|----------------------------------------|----------|------|
|                          |                                     | Low                                | Moderate | High | Low                                    | Moderate | High |
| 5z hub                   | 360°                                | 10°                                | 15°      | 20°  | 2%                                     | 4%       | 6%   |
| 5z hub                   | 30°                                 |                                    |          |      |                                        |          |      |
| 10z hub                  |                                     |                                    |          |      |                                        |          |      |
| 20z hub                  |                                     |                                    |          |      |                                        |          |      |

## S2. Energy yield model

### S2.1 Measurement-to-turbine translation

Wind conditions at each turbine are derived from the measured data using a simplified WAsP theoretical framework [2]. The translation applies sector-wise speed-up factor  $\mathbf{F}(\boldsymbol{\theta}, \mathbf{ms}, \mathbf{t})$  between measurement location to turbine location. This factor is derived from multiplicative contributions of orography (F.oro), terrain surface roughness (F.rou), and obstacle (F.obs) factors, as in the equation (S1) below:

$$\mathbf{F}(\boldsymbol{\theta}, \mathbf{ms}, \mathbf{t}) = \frac{\mathbf{F.oro}_t(\boldsymbol{\theta})}{\mathbf{F.oro}_{ms}(\boldsymbol{\theta})} \times \frac{\mathbf{F.rou}_t(\boldsymbol{\theta})}{\mathbf{F.rou}_{ms}(\boldsymbol{\theta})} \times \frac{\mathbf{F.obs}_t(\boldsymbol{\theta})}{\mathbf{F.obs}_{ms}(\boldsymbol{\theta})} \quad (\text{S1})$$

where for each sector  $\theta$ :

- $U_{ms}(\theta)$  : mean wind speed measured, at height  $h_{ms} = 160\text{m}$
- $U_t(\theta)$  : mean wind speed at the turbine hub height  $h_{\text{hub}} = h_{msm} + \Delta e_{msm,t}$
- $\mathbf{F.oro}_{ms}(\theta)$  : orographic factor at the measurement location
- $\mathbf{F.oro}_t(\theta)$  : orographic factor at the turbine location
- $\mathbf{F.rou}_{ms}(\theta)$  : roughness factor at the measurement location
- $\mathbf{F.rou}_t(\theta)$  : roughness factor at the turbine location
- $\mathbf{F.obs}_{ms}(\theta)$  : obstacle factor at the measurement location
- $\mathbf{F.obs}_t(\theta)$  : obstacle factor at the turbine location

**Orographic factor** (F.oro): A local hill-slope approximation based on GLO-30 digital elevation map (DEM) [3]. For each sector  $\theta$ , at each location with elevation ( $e_{\text{start}}$ ), a transect  $L = 1.000\text{m}$  is extracted. The mean elevation along this transect ( $e_{\text{end}}$ ) is taken. As suggestion at [4], the orographic factor  $\mathbf{F.oro}(\theta)$  is calculated based on the local hill-slope ( $\frac{\Delta E}{L}$ ), with  $\Delta E(\theta) = e_{\text{end}}(\theta) - e_{\text{start}}(\theta)$ . Applying for measurement location and turbine is as in the equation (S2):

$$\frac{\mathbf{F.oro}_t(\boldsymbol{\theta})}{\mathbf{F.oro}_{ms}(\boldsymbol{\theta})} \approx \frac{1 + 1.6 \times \frac{\Delta E_t(\boldsymbol{\theta})}{L}}{1 + 1.6 \times \frac{\Delta E_{ms}(\boldsymbol{\theta})}{L}} \quad (\text{S2})$$

**Roughness factor** (F.rou): From global landcover map [5], for each sector  $\theta$ , at each location, an mean roughness length ( $z_0(\theta)$ ) for the area within radian of 10km from the location is extracted. Neutral-stratification log-law is assumed with friction velocity ( $U_*$ ) and von Kármán constant (K) as below [6]. Under the assumption that  $U_*$  and K are the same for the generalized climate and the two sites in each sector, the relative roughness factor between measurement and turbine is:

$$\frac{F.rou_t(\theta)}{F.rou_{ms}(\theta)} \approx \frac{\ln\left(\frac{h_{hub}}{z_{0,t}(\theta)}\right)}{\ln\left(\frac{h_{msm}}{z_{0,ms}(\theta)}\right)} = \frac{\ln\left(\frac{h_{ms} + \Delta e_{ms,t}}{z_{0,t}(\theta)}\right)}{\ln\left(\frac{h_{ms}}{z_{0,ms}(\theta)}\right)} \quad (S3)$$

**Obstacle factor (F. obs):** In this study, the obstacle factor is strongly simplified:

- Obstacles are inferred qualitatively from land-cover map [5] and classes around the sites
- For each sector  $\theta$ , the obstacle factors are assumed to be close to unity:  
 $F. obs_t(\theta) \approx 1.0$  with relative adjustments applied where big differences are seen within the area.

25

**Summary:** For each turbine and each of the 12 sectors, in relative with measured wind speed at the same sector, a total simplified WAsP-style speed-up factor is generated as in the equation (S1). Table S3 summarises all sector-wise speed-up factors that applied to the measured wind speed to obtain the sectoral wind climate at each turbine.

**Table S3: Sector-wise speed-up factors for measurement-to-turbine extrapolation**

| Sector ( $\theta$ )                   | 1    | 2    | 3    | 4    | 5    | 6    | 7    | 8    | 9    | 10   | 11   | 12   |
|---------------------------------------|------|------|------|------|------|------|------|------|------|------|------|------|
| Ms.point                              | 1.00 | 1.00 | 1.00 | 1.00 | 1.00 | 1.00 | 1.00 | 1.00 | 1.00 | 1.00 | 1.00 | 1.00 |
| <b>F(<math>\theta</math>, msm, t)</b> |      |      |      |      |      |      |      |      |      |      |      |      |
| T1                                    | 0.99 | 1.00 | 1.00 | 1.00 | 1.00 | 0.99 | 1.00 | 0.87 | 0.67 | 0.68 | 1.57 | 1.57 |
| T2                                    | 1.26 | 1.51 | 1.00 | 1.00 | 0.67 | 0.67 | 1.01 | 0.87 | 0.67 | 0.68 | 1.57 | 1.04 |
| T3                                    | 0.99 | 1.00 | 1.00 | 1.00 | 0.67 | 0.99 | 1.02 | 1.11 | 0.68 | 0.68 | 1.10 | 1.04 |
| T4                                    | 0.98 | 1.01 | 0.99 | 1.01 | 1.00 | 0.99 | 1.48 | 1.28 | 0.68 | 0.69 | 1.04 | 1.05 |
| T5                                    | 0.98 | 1.01 | 1.00 | 1.01 | 1.00 | 0.66 | 0.99 | 1.28 | 0.69 | 0.69 | 1.05 | 1.05 |
| T6                                    | 1.47 | 1.52 | 1.50 | 1.50 | 0.67 | 0.66 | 0.99 | 0.85 | 0.67 | 1.03 | 1.59 | 1.58 |
| T7                                    | 1.01 | 1.01 | 1.00 | 1.00 | 0.67 | 0.66 | 1.00 | 1.31 | 1.01 | 1.03 | 1.04 | 1.04 |
| T8                                    | 1.51 | 1.01 | 1.12 | 1.00 | 0.67 | 0.99 | 1.50 | 1.31 | 1.01 | 1.02 | 1.57 | 1.55 |
| T9                                    | 0.99 | 1.00 | 1.01 | 1.00 | 0.67 | 0.99 | 1.49 | 1.30 | 1.02 | 1.02 | 1.58 | 1.03 |
| T10                                   | 0.98 | 1.01 | 1.00 | 1.00 | 0.67 | 0.66 | 1.49 | 1.28 | 1.04 | 1.02 | 1.05 | 1.03 |
| T11                                   | 0.98 | 1.01 | 1.00 | 1.00 | 0.68 | 1.02 | 1.52 | 1.29 | 1.09 | 1.11 | 1.64 | 1.07 |
| T12                                   | 0.99 | 1.01 | 1.50 | 1.50 | 0.68 | 0.68 | 1.52 | 0.86 | 0.73 | 0.73 | 1.09 | 1.21 |
| T13                                   | 1.48 | 1.52 | 1.00 | 1.50 | 0.68 | 0.68 | 1.01 | 0.86 | 0.72 | 0.73 | 1.10 | 1.46 |
| T14                                   | 1.48 | 1.52 | 1.50 | 1.50 | 0.68 | 0.68 | 1.01 | 1.29 | 1.08 | 1.09 | 1.66 | 1.66 |
| T15                                   | 1.51 | 1.51 | 1.51 | 1.50 | 1.02 | 1.02 | 1.01 | 0.86 | 0.74 | 0.75 | 1.65 | 1.61 |
| T16                                   | 1.52 | 1.52 | 1.50 | 0.99 | 0.68 | 0.68 | 1.30 | 0.86 | 0.73 | 0.75 | 1.10 | 1.08 |
| T17                                   | 1.51 | 1.52 | 1.00 | 0.99 | 0.68 | 0.68 | 1.01 | 1.30 | 1.09 | 0.74 | 1.10 | 1.09 |
| T18                                   | 1.52 | 1.52 | 1.50 | 1.48 | 1.02 | 1.01 | 1.52 | 1.32 | 0.74 | 0.76 | 1.65 | 1.62 |
| T19                                   | 1.02 | 1.01 | 1.00 | 0.99 | 1.02 | 0.68 | 1.01 | 1.15 | 0.74 | 1.13 | 1.09 | 1.09 |
| T20                                   | 1.02 | 1.01 | 0.99 | 0.99 | 0.68 | 0.68 | 1.01 | 0.89 | 0.74 | 0.75 | 1.09 | 1.10 |

30

## S2.2 Sector-wise Weibull fits

The Weibull probability density function (PDF), with two-parameters: the yielding shape  $k_{\theta,t}$  and the scale  $C_{\theta,t}$ , is calculated as in the equation (S4) [7].

$$f_{t,\theta}(U_t) = \frac{k_{\theta,t}}{C_{\theta,t}} \left( \frac{U_t}{C_{\theta,t}} \right)^{k_{\theta,t}-1} \exp \left[ -\frac{U_t}{C_{\theta,t}} \right]^{k_{\theta,t}} ; k_{\theta,t} > 0, C_{\theta,t} > 1, U_t > 0 \quad (S4)$$

where,  $f_{t,\theta}(U_t)$  is the frequency of  $U_t$ , number between 0 and 1

35

## S2.3 Gross energy calculation

The expected power in sector  $\theta$  is obtained by numerically integrating the product of the power curve  $P(U_t)$  and  $f_{\theta,t}(U_t)$  over wind speed, as in the equation (S5) [8], [9].

$$P_{\theta,t} = \int_{U_{in}}^{U_{out}} P(U_t) f_{t,\theta}(U_t) dU_t \quad (S5)$$

The mean power of turbine  $t$ ,  $P_t$ , is calculated by weighting the sectoral expected powers  $P_{\theta,t}$  with the wind direction occurrence frequency  $\omega_{\theta,t}$  in each sector, as in the equation (S6).

40

$$P_t = \sum_{\theta} P_{\theta,t} \omega_{\theta,t} \quad (S6)$$

The turbine's mean power is converted to the turbine's gross annual energy (GrossAEP<sub>t</sub>) by multiplying it by the annual operating hours, as in the equation (S7):

$$\text{GrossAEP}_t = P_t \times 8760 \quad (S7)$$

## S2.4 Loss assumption

A constant wake loss of 8% is assumed to affect downstream turbines [10]. Additional plant-wide losses are assumed as follows: availability 3% ( $L_{ava}$ ), electrical 2% ( $L_{ele}$ ), curtailment 1% ( $L_{cur}$ ), and other 1% ( $L_{oth}$ ) based on [10], [2]:

45

$$\text{GrossAEP}_{t, \text{ afterwake}} = \text{GrossAEP}_t \times (1 - L_{wake}) \quad (S8)$$

$$\text{NetAEP} = \text{GrossAEP}_{\text{afterwake}} \times (1 - L_{ava} - L_{ele} - L_{cur} - L_{oth}) \quad (S9)$$

## **References of S2:**

- [2] N. G. Mortensen, D. N. Heathfield, O. Rathmann, and M. Nielsen, "Wind Atlas Analysis and Application Program: WAsP 10 Help Facility." DTU Wind Energy., 2011. Accessed: Nov. 07, 2025. [Online]. Available: [https://backend.orbit.dtu.dk/ws/portalfiles/portal/116352660/WAsP\\_10\\_Help\\_Facility.pdf](https://backend.orbit.dtu.dk/ws/portalfiles/portal/116352660/WAsP_10_Help_Facility.pdf)
- [3] OpenTopography, "Copernicus GLO-90 Digital Surface Model," 2021, OpenTopography. doi: 10.5069/G9028PQB.
- [4] J. Finnigan et al., "Boundary-Layer Flow Over Complex Topography," *Bound.-Layer Meteorol.*, vol. 177, no. 2–3, pp. 247–313, Dec. 2020, doi: 10.1007/s10546-020-00564-3.
- [5] D. Zanaga et al., "ESA WorldCover 10 m 2020 v100." Zenodo, Oct. 20, 2021. doi: 10.5281/ZENODO.5571936.
- 60 [6] R. Byrne, N. J. Hewitt, P. Griffiths, and P. MacArtain, "A comparison of four microscale wind flow models in predicting the real-world performance of a large-scale peri-urban wind turbine, using onsite LiDAR wind measurements," *Sustain. Energy Technol. Assess.*, vol. 46, p. 101323, Aug. 2021, doi: 10.1016/j.seta.2021.101323.
- [7] I. Kamdar, S. Ali, J. Taweekun, and H. M. Ali, "Wind Farm Site Selection Using WAsP Tool for Application in the Tropical Region," *Sustainability*, vol. 13, no. 24, p. 13718, Dec. 2021, doi: 10.3390/su132413718.
- 65 [8] S. Afanasyeva, J. Saari, M. Kalkofen, J. Partanen, and O. Pyrhönen, "Technical, economic and uncertainty modelling of a wind farm project," *Energy Convers. Manag.*, vol. 107, pp. 22–33, Jan. 2016, doi: 10.1016/j.enconman.2015.09.048.
- [9] A. Schaffarczyk, *Understanding Wind Power Technology: Theory, Deployment and Optimisation*, 1st ed. in New York Academy of Sciences Series. Newark: John Wiley & Sons, Incorporated, 2014.
- [10] R. Veena, M. Manuel S, S. Mathew, and Petra M, "Wake Induced Power Losses in Wind Farms," *Int. J. Eng. Adv. Technol.*, vol. 9, no. 3, pp. 2175–2180, Feb. 2020, doi: 10.35940/ijeat.C5611.029320.
- 70

### S3. Debt sizing impacts to project NPV and LCOE

The DSCR is a financial ratio comparing cash available for debt service to scheduled debt obligations. The DSCR for year  $i$  is typically calculated as in the equation (S10) [11]:

$$\text{DSCR}_i = \frac{\text{CFADS}_i}{\text{PR}_i + \text{IR}_i} = \frac{\text{P90}_i \times \text{Tariff}_i - \text{OPEX}_i}{\text{PR}_i + \text{IR}_i} \quad (\text{S10})$$

where  $\text{CFADS}_i$  is the cash flow available for debt service (€),  $\text{PR}_i$  is principal repayment (€),  $\text{IR}_i$  is interest repayment (€),  
75  $\text{Tariff}_i$  is the realised average power price (€/MWh), and  $\text{OPEX}_i$  is operating expenditure (fixed and variable, €) in year  $i$ .

Debt capacity is the present value of the debt service series ( $\text{PR}_i + \text{IR}_i$ ) over the entire loan term  $I$  years with interest rate  $r$ , as in the equation (S11) [11], [12]:

$$\text{Debt Capacity} = \sum_{i=1}^I \frac{\text{PR}_i + \text{IR}_i}{(1+r)^i} = \frac{1}{\text{DSCR target}} \times \sum_{i=1}^I \frac{\text{CFADS}_i}{(1+r)^i} \quad (\text{S11})$$

The DSCR-based debt capacity feeds into a standard project cash flow model to evaluate NPV and LCOE. NPV is defined here as the present value of equity cash flows minus the initial equity investment, as in the equation (S12). LCOE is defined  
80 as the ratio of the discounted sum of all project costs to the discounted sum of net energy production [11], as in the equation (S13).

$$\text{NPV} = \sum_{i=1}^{25} \frac{\text{EBIT}_i (1 - \text{Tax})}{(1 + \text{WACC})^i} - \text{CAPEX} = \sum_{i=1}^{25} \frac{(\text{P90}_i \times \text{Tariff}_i - \text{OPEX}_i)(1 - \text{Tax})}{(1 + \text{WACC})^i} - \text{CAPEX} \quad (\text{S12})$$

where,  $\text{EBIT}_i$  is the earnings before interest and tax in year  $i$ , WACC is the weighted average cost of capital (i.e. the average rate a firm pays for using debt and equity).

$$\text{LCOE} = \frac{\text{CAPEX} + \sum_{i=1}^{25} \frac{\text{OPEX}_i}{(1 + \text{WACC})^i}}{\sum_{t=1}^{25} \frac{\text{P90}_t}{(1 + \text{WACC})^t}} \quad (\text{S13})$$

### 85 References of S3:

[11] E. B. Mora, J. Spelling, A. H. Van Der Weijde, and E.-M. Pavageau, "The effects of mean wind speed uncertainty on project finance debt sizing for offshore wind farms," *Appl. Energy*, vol. 252, p. 113419, Oct. 2019, doi: 10.1016/j.apenergy.2019.113419.

[12] A. Henderson, R. Gandoin, M. Marchante, H. Yendole, and M. Méchali, "Benefits of Measuring the Wind Resource - How Value is Created for the Windfarm," in *ResearchGate*, Barcelona, Spain, Oct. 2014. Accessed: Nov. 08, 2025. [Online]. Available: [https://www.researchgate.net/publication/267099324\\_Benefits\\_of\\_Measuring\\_the\\_Wind\\_Resource\\_-\\_How\\_Value\\_is\\_Created\\_for\\_the\\_Windfarm](https://www.researchgate.net/publication/267099324_Benefits_of_Measuring_the_Wind_Resource_-_How_Value_is_Created_for_the_Windfarm)  
90
